# Supplementary material
Source: publisher figshare collection journal article supplement (https://acs.figshare.com/ndownloader/files/8539921)
Supplement: Supplementary file 1 [file 8539921]

## Supplementary Information for

### Polydopamine generates hydroxyl free-radical under UV-light irradiation

*Zehuan Wang, Feng Tang, Hailong Fan, Le Wang, Zhaoxia Jin\**

Department of Chemistry, Renmin University of China, Beijing, 100872,

People's Republic of China

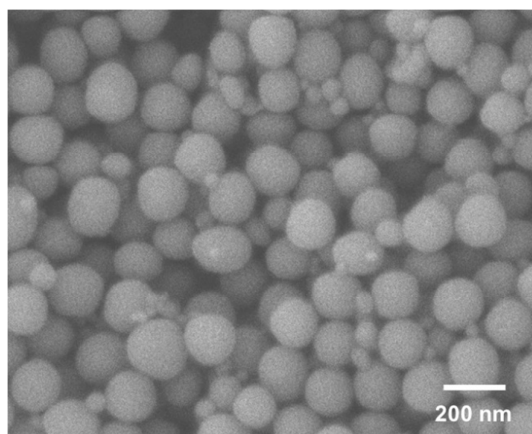

Figure S1. SEM image of PDA SPs.

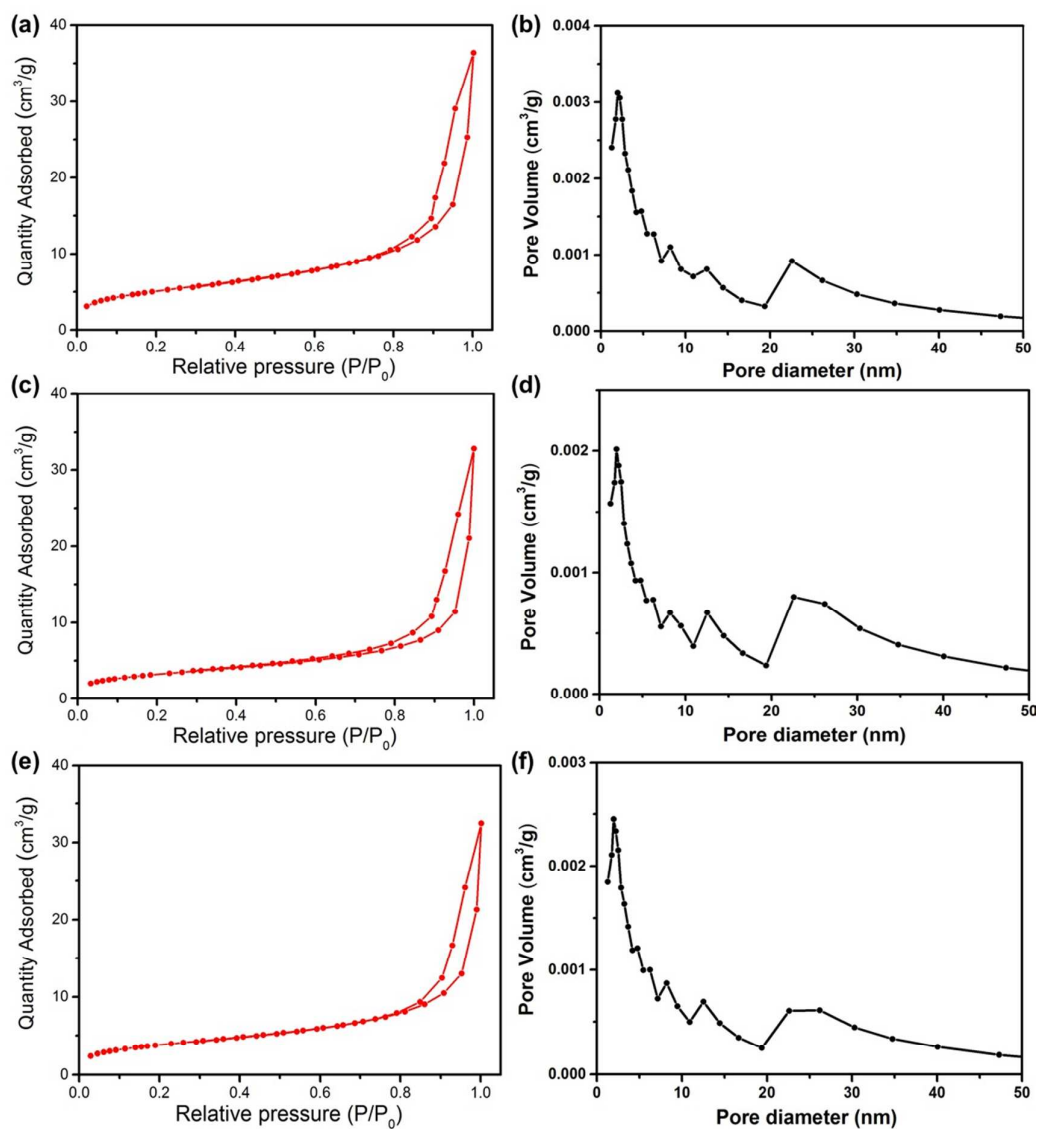

Figure S2. (a) N<sub>2</sub> adsorption–desorption isotherm of PDA NTs. (b) The BJH corresponding pore size distribution curve of PDA NTs. (c) N<sub>2</sub> adsorption–desorption isotherm of PDA LPs. (d) The BJH corresponding pore size distribution curve of PDA LPs. (e) N<sub>2</sub> adsorption–desorption isotherm of PDA SPs. (f) The BJH corresponding pore size distribution curve of PDA SPs.

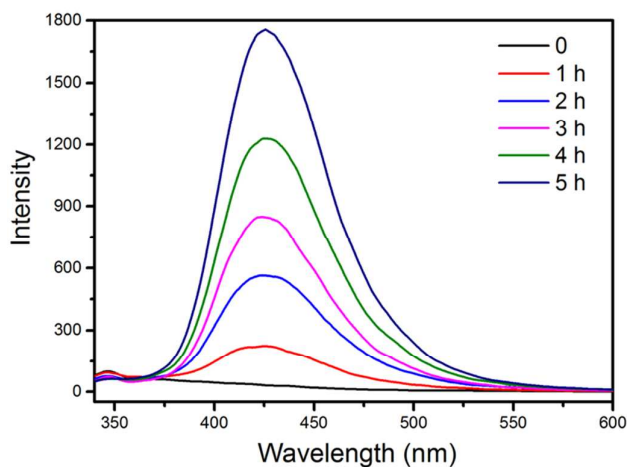

Figure S3. Fluorescence spectra of HTA in the presence of UV-illuminated PDA SPs (15 mg in 85 mL water,  $Ex = 315$  nm,  $Em = 425$  nm).

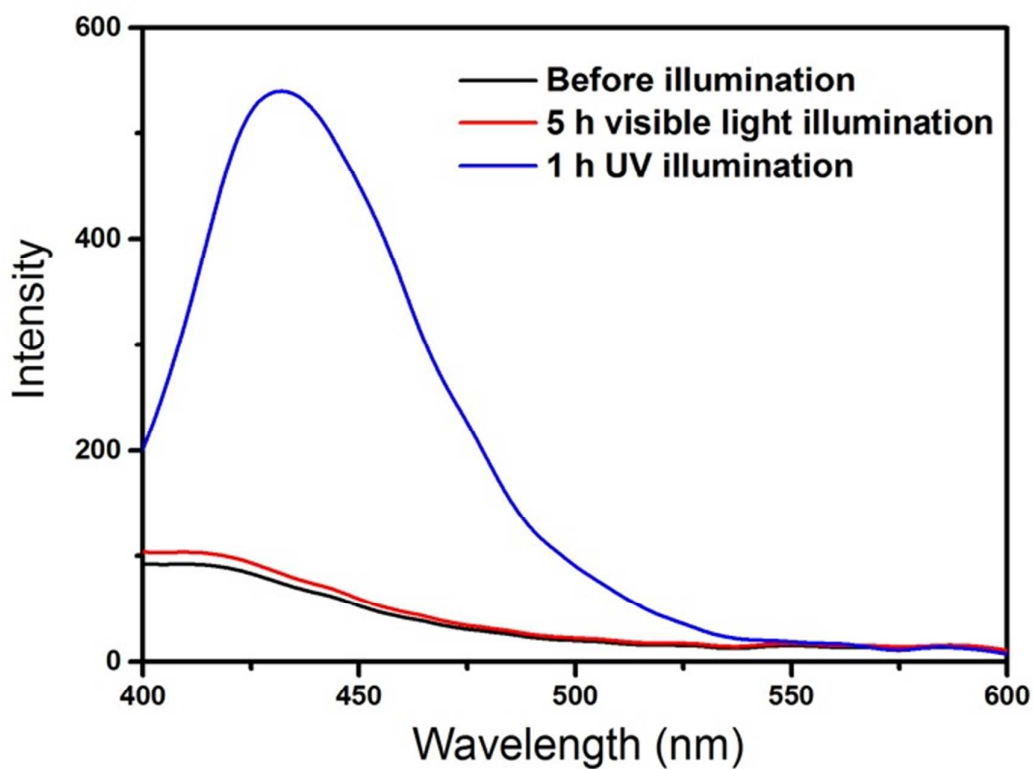

Figure S4. Fluorescence spectra of HTA in the presence of PDA LPs (15 mg in 85 mL water,  $Ex = 315$  nm,  $Em = 425$  nm) before illumination, 5 h visible light illumination and 1 h UV illumination.

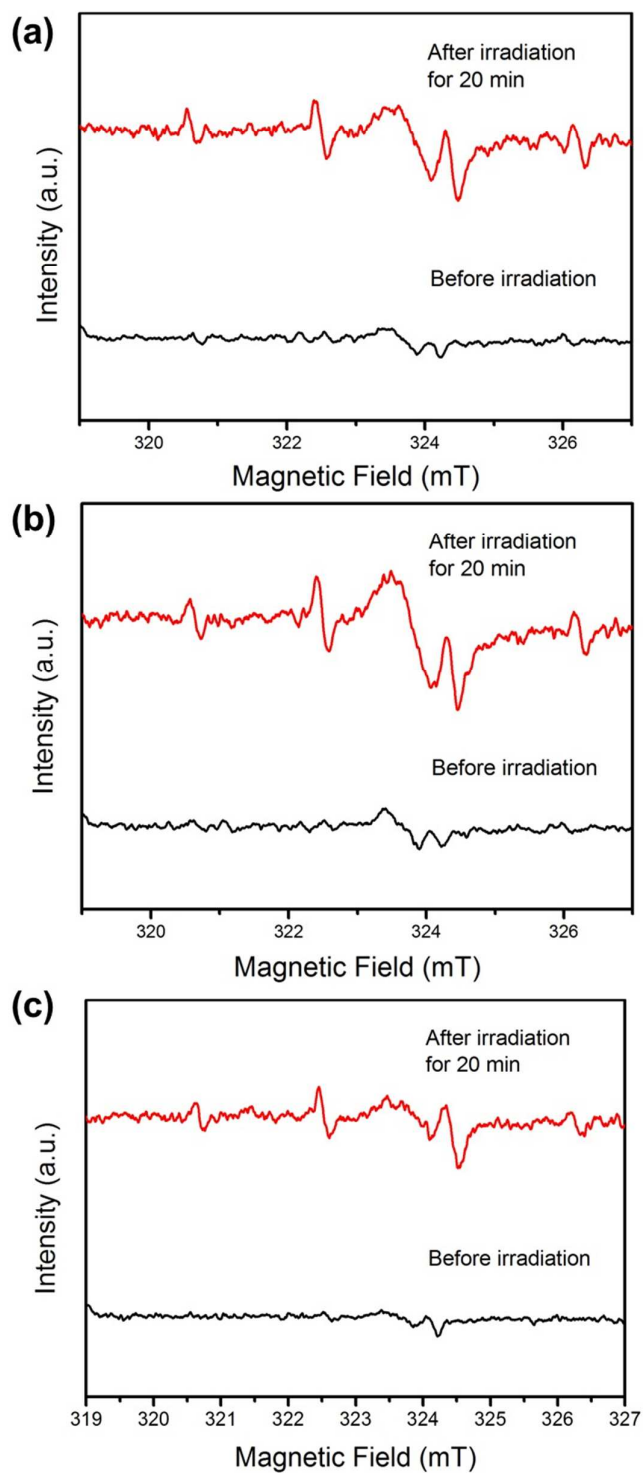

Figure S5. ESR signals of DMPO-OH spin adducts in the solution of (a) 1 mg/mL PDA NTs solution before and after UV irradiation, (b) 1 mg/mL PDA LPs solution before and after UV irradiation, (c) 1 mg/mL PDA SPs solution before and after UV irradiation.

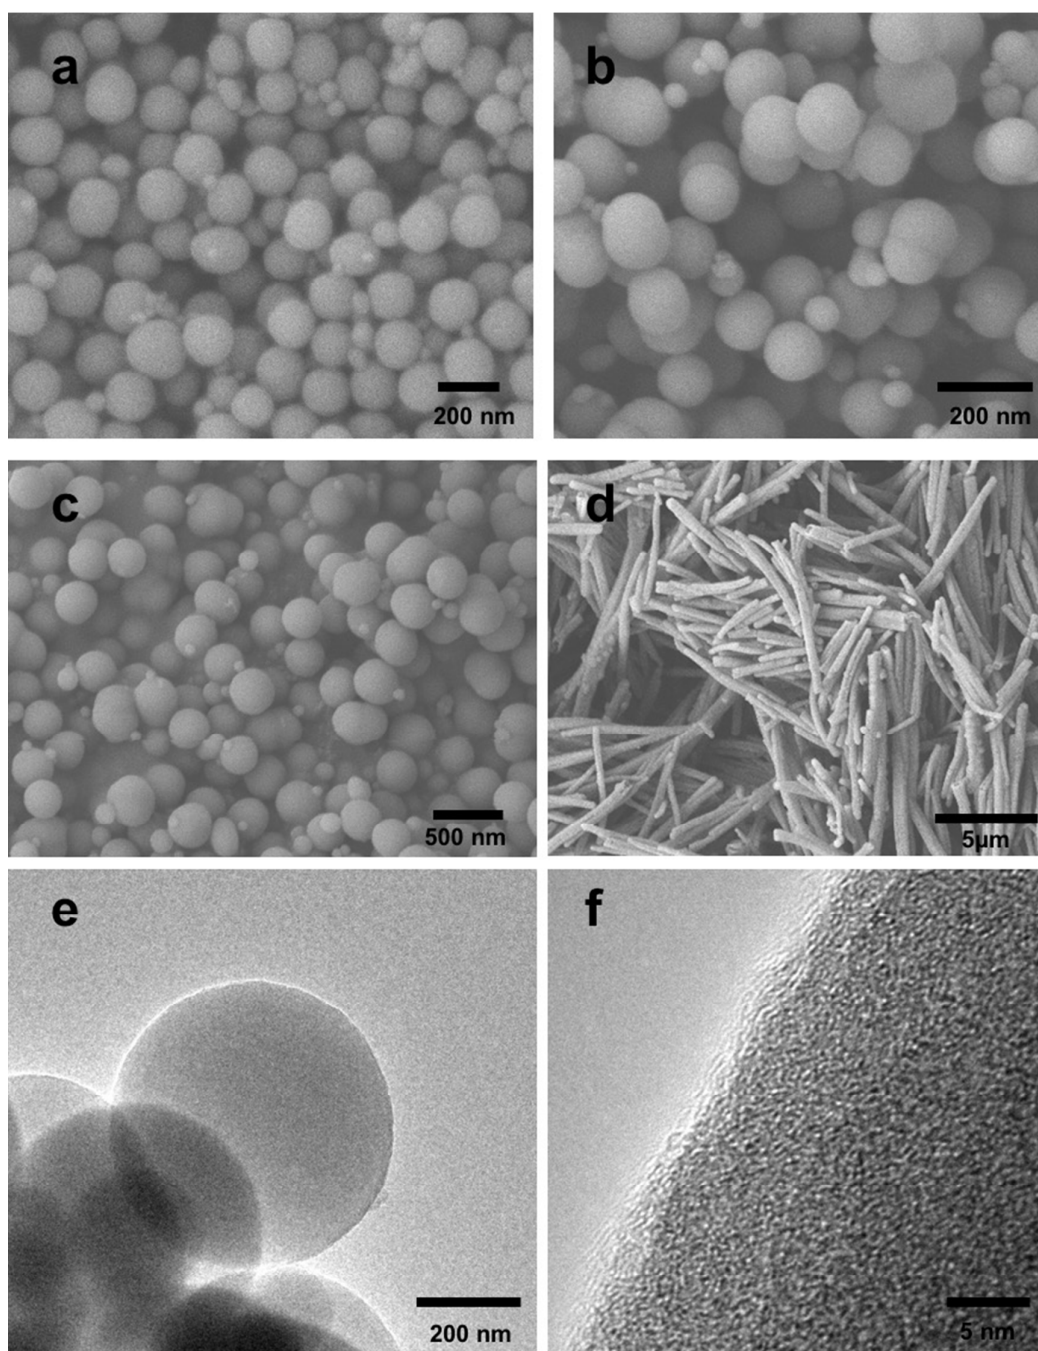

Figure S6. (a) SEM image of original PDA SPs. (b) SEM image of UV-irradiated PDA SPs. (c) SEM image of UV-irradiated PDA LPs. (d) SEM image of UV-irradiated PDA NTs. (e) TEM image of UV-irradiated PDA LPs. (f) HRTEM image of UV-irradiated PDA LPs.

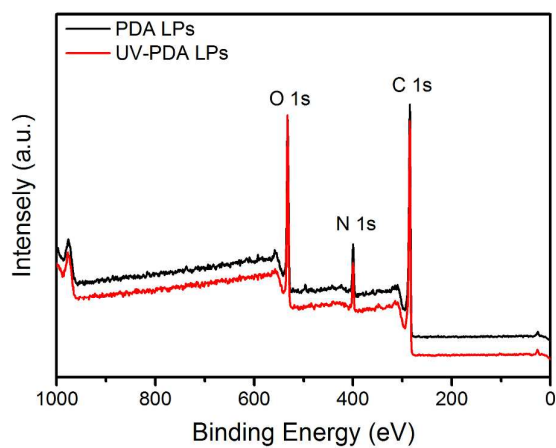

Figure S7. XPS spectra of PDA LPs and UV-illuminated PDA LPs.

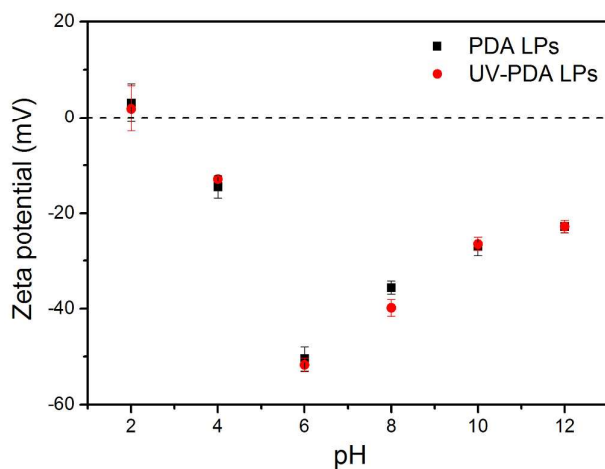

Figure S8. Zeta potential of PDA LPs and UV-irradiated PDA LPs.

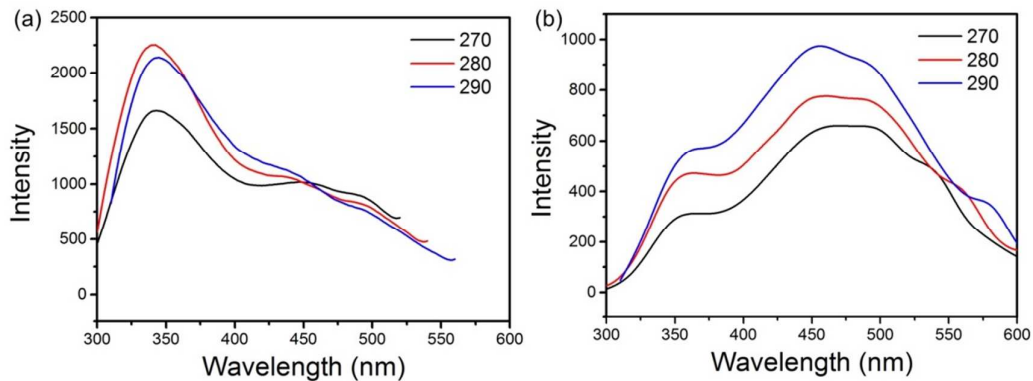

Figure S9. Fluorescence spectra of (a) UV-illuminated (5 h) PDA LPs solution, (b)

D-PDA LPs solution upon excitation at 270 nm, 280 nm and 290 nm.

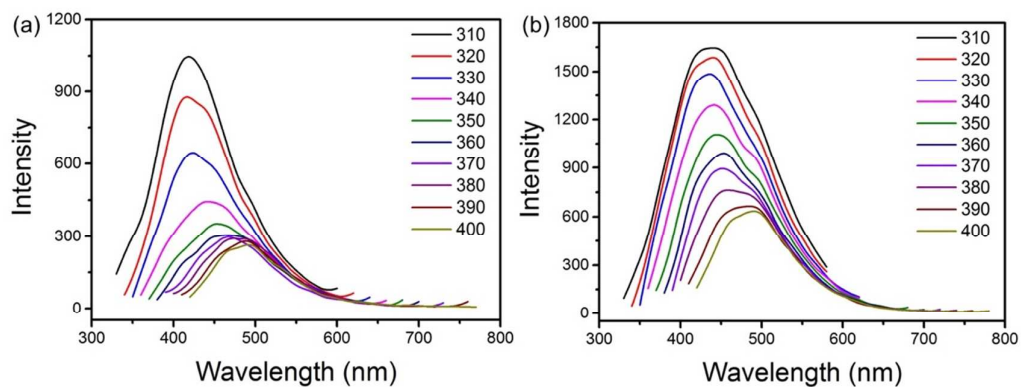

Figure S10. Fluorescence spectra of (a) UV-illuminated (5 h) PDA NTs solution, (b) D- PDA NTs solution.

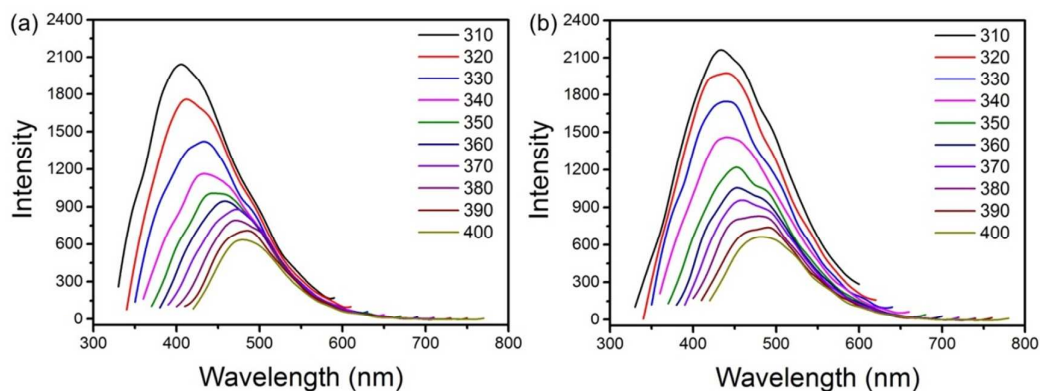

Figure S11. Fluorescence spectra of (a) UV-illuminated (5 h) PDA SPs solution, (b) D- PDA SPs solution.

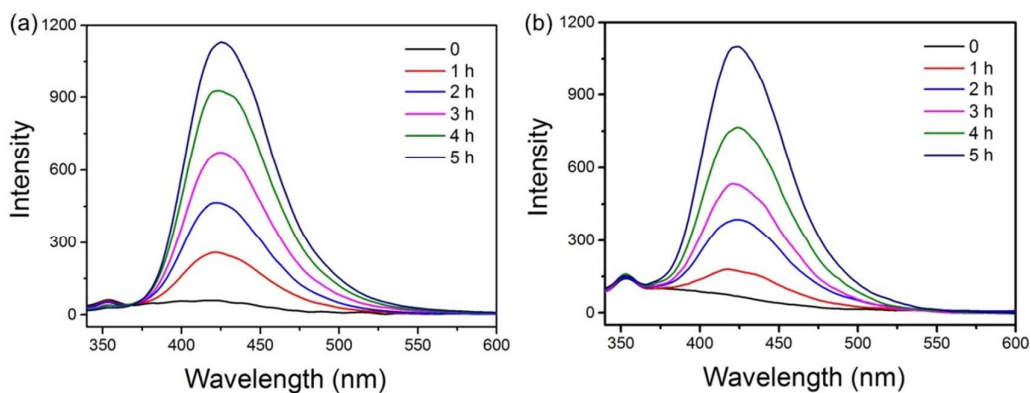

Figure S12. Fluorescence spectra of HTA in the presence of (a) D-PDA LPs and (b) D-PDA NTs under UV-light irradiation from 1h to 5h.



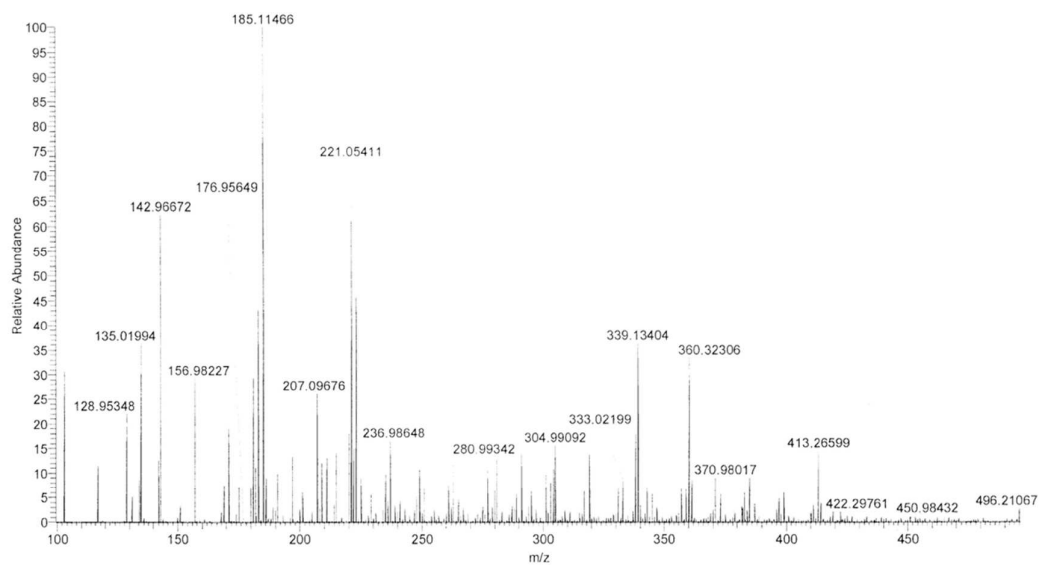

Figure S13. ESI-TOF mass spectrum of D-PDA NTs. Peaks at  $m/z \sim 185$  and 360 originate from internal labeling substances.

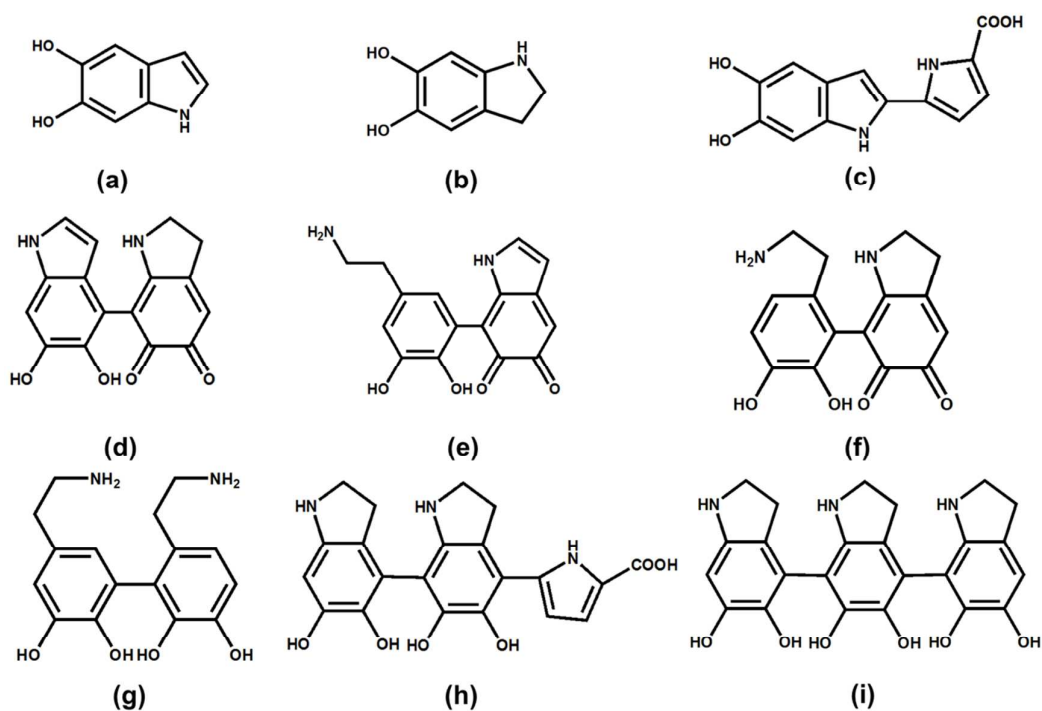

Figure S14. Possible oligomer structures of UV PDA nanomaterials or D-PDA.



Table S1 BET specific surface areas of PDA nanostructures.

| Sample name | BET ( $\text{m}^2\text{g}^{-1}$ ) | Total pore volume ( $\text{cm}^3\text{g}^{-1}$ ) | Mean pore diameter (nm) |
|-------------|-----------------------------------|--------------------------------------------------|-------------------------|
| PDA NTs     | 17.967                            | 0.043332                                         | 9.64                    |
| PDA LPs     | 11.315                            | 0.036549                                         | 12.92                   |
| PDA SPs     | 13.194                            | 0.03297                                          | 11.99                   |

Table S2. Assigned peaks in ESI-TOF MS of five samples.

|            | m/z peak | calculated mass | Proposed oligomers |
|------------|----------|-----------------|--------------------|
| UV PDA NTs | 173.028  | 173.044         | a+Na+H             |
|            | 301.141  | 301.111         | f+H                |
|            | 413.266  | 413.227         | h+4H               |
|            | 496.209  | 496.146         | i+2Na+H            |
| UV PDA LPs | 166.086  | 166.051         | a+OH               |
|            | 255.164  | 258.229         | c-3H               |
|            | 274.274  | 274.229         | c+OH               |
|            | 318.300  | 318.070         | d+Na-H             |
|            | 338.342  | 338.399         | e+K+H              |
| UV PDA SPs | 166.086  | 166.051         | a+OH               |
|            | 195.186  | 195.126         | a+2Na              |
|            | 304.261  | 304.341         | g                  |
|            | 338.342  | 338.399         | e+K+H              |
|            | 413.266  | 413.227         | h+4H               |
| D-PDA LPs  | 221.054  | 221.040         | b+3Na+H            |
|            | 319.006  | 319.070         | d+Na               |
|            | 339.134  | 339.399         | e+K+2H             |
| D-PDA NTs  | 221.054  | 221.040         | b+3Na+H            |
|            | 339.134  | 339.399         | e+K+2H             |
|            | 413.266  | 413.227         | h+4H               |
